# Supplementary material for: Gut dysbiosis impairs hippocampal plasticity and behaviors by remodeling serum metabolome
Source: PubMed Central journal article supplement (PMC9327780; doi:10.1080/19490976.2022.2104089), 2022-07-24
Supplement: KGMI_A_2104089_SM8576.pdf [file KGMI_A_2104089_SM8576.pdf]

Supplemental Information

Supplementary Figures

Fig.S1

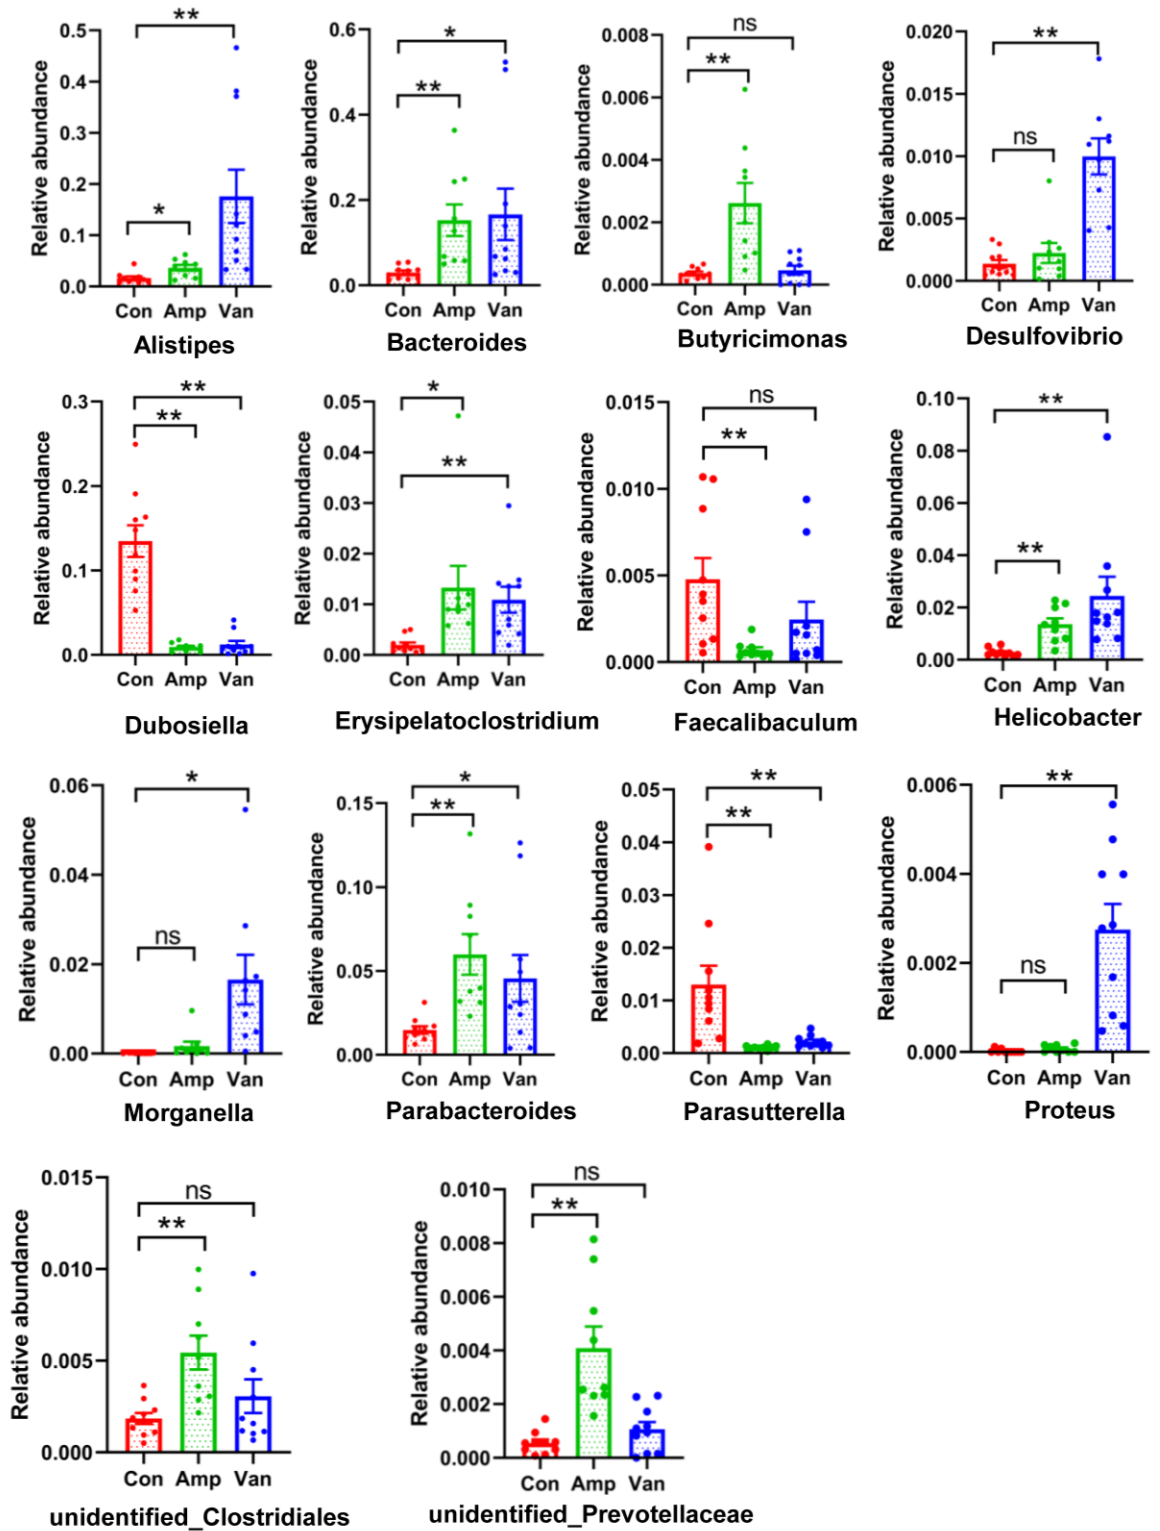

**Figure S1: Relative abundance of representative bacteria genera that were significantly altered following disruption of gut microbiota.**

The *Alistipes*, *Megamonas*, *Desulfovibrio*, and *Butyrivimonas* increased their abundance in antibiotic-treated mice, while other bacteria showed the opposite trend, such as *Dubosiella*, *Parasutterella* and *Faecalibaculum*. The specific changes of such bacteria have been reported in patients with major depressive disorder, autism, memory deficit, and gastrointestinal disorders. Data are presented as mean  $\pm$  SEM, n=9-10/group, unpaired two-tailed *t*-test, \* $P$ <0.05, \*\* $P$ <0.01, ns: no significance.

Fig.S2

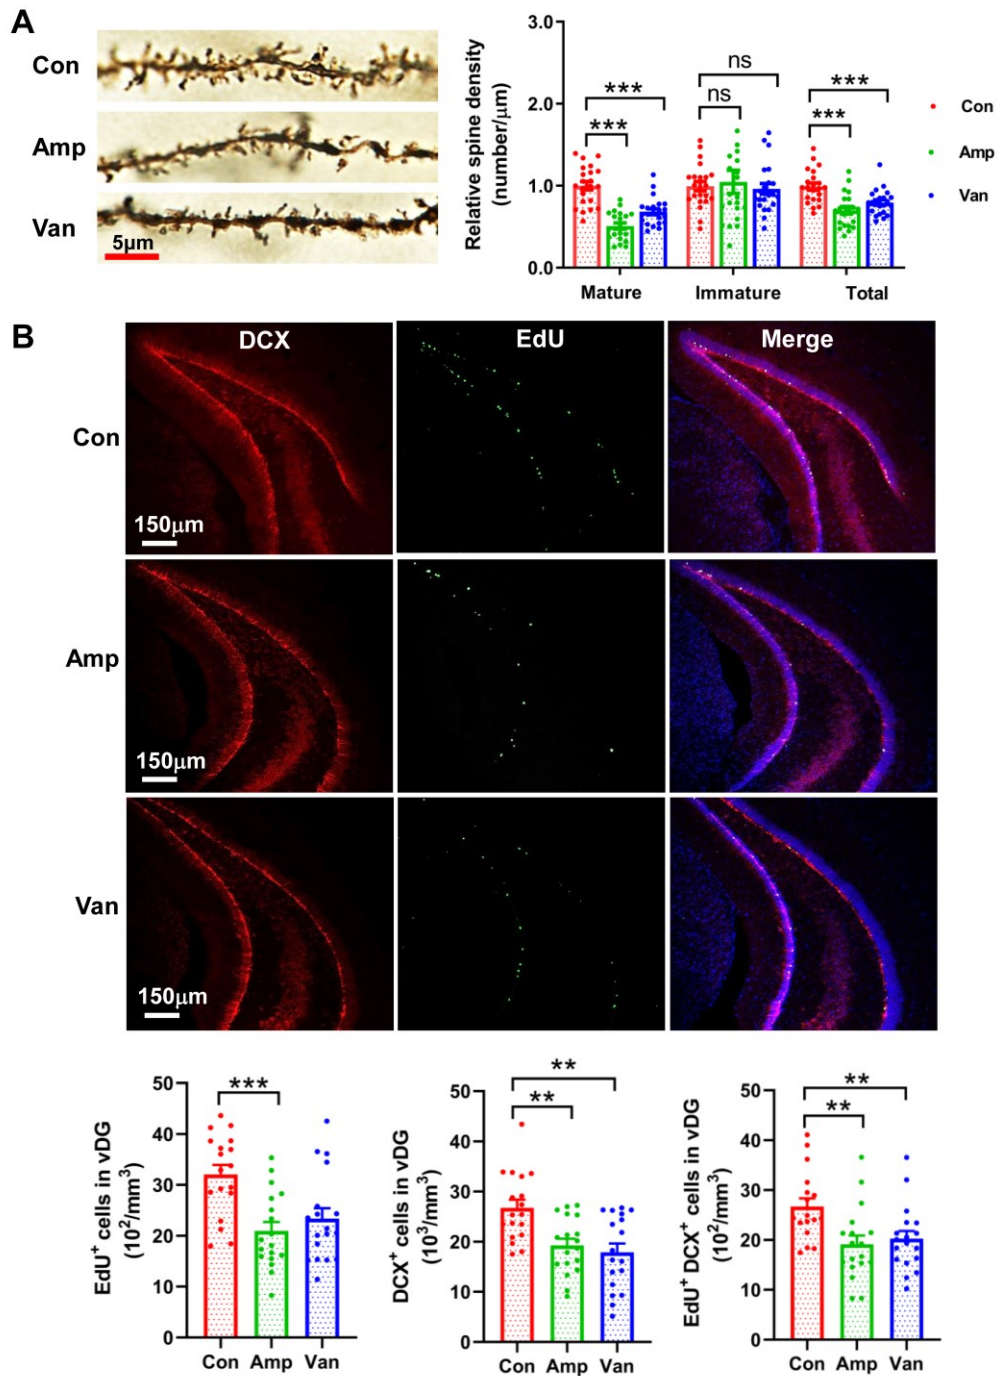

**Figure S2: Disruption of gut microbiota impairs hippocampal CA1 spine maturation and adult neurogenesis**

(A) Golgi staining was used to visualize apical dendritic processes in the CA1 of the ventral hippocampus, the mature-appearing spine (mushroom spine) decreased following disruption of gut microbiota. N=3/group. Data are presented as mean  $\pm$  SEM, unpaired two-tailed *t*-test, \*\*\* $P < 0.001$ , ns: no significance. (B) The

representative micrographs and quantitative analysis of the cells positive for EdU and DCX in the ventral DG (vDG). EdU was used to label the proliferation of hippocampal progenitor cells, DCX was used to reflect neuronal differentiation. N=3/group. Data are presented as mean  $\pm$  SEM, unpaired two-tailed *t*-test, \*\*P<0.01, \*\*\*P<0.001.

**Fig.S3**

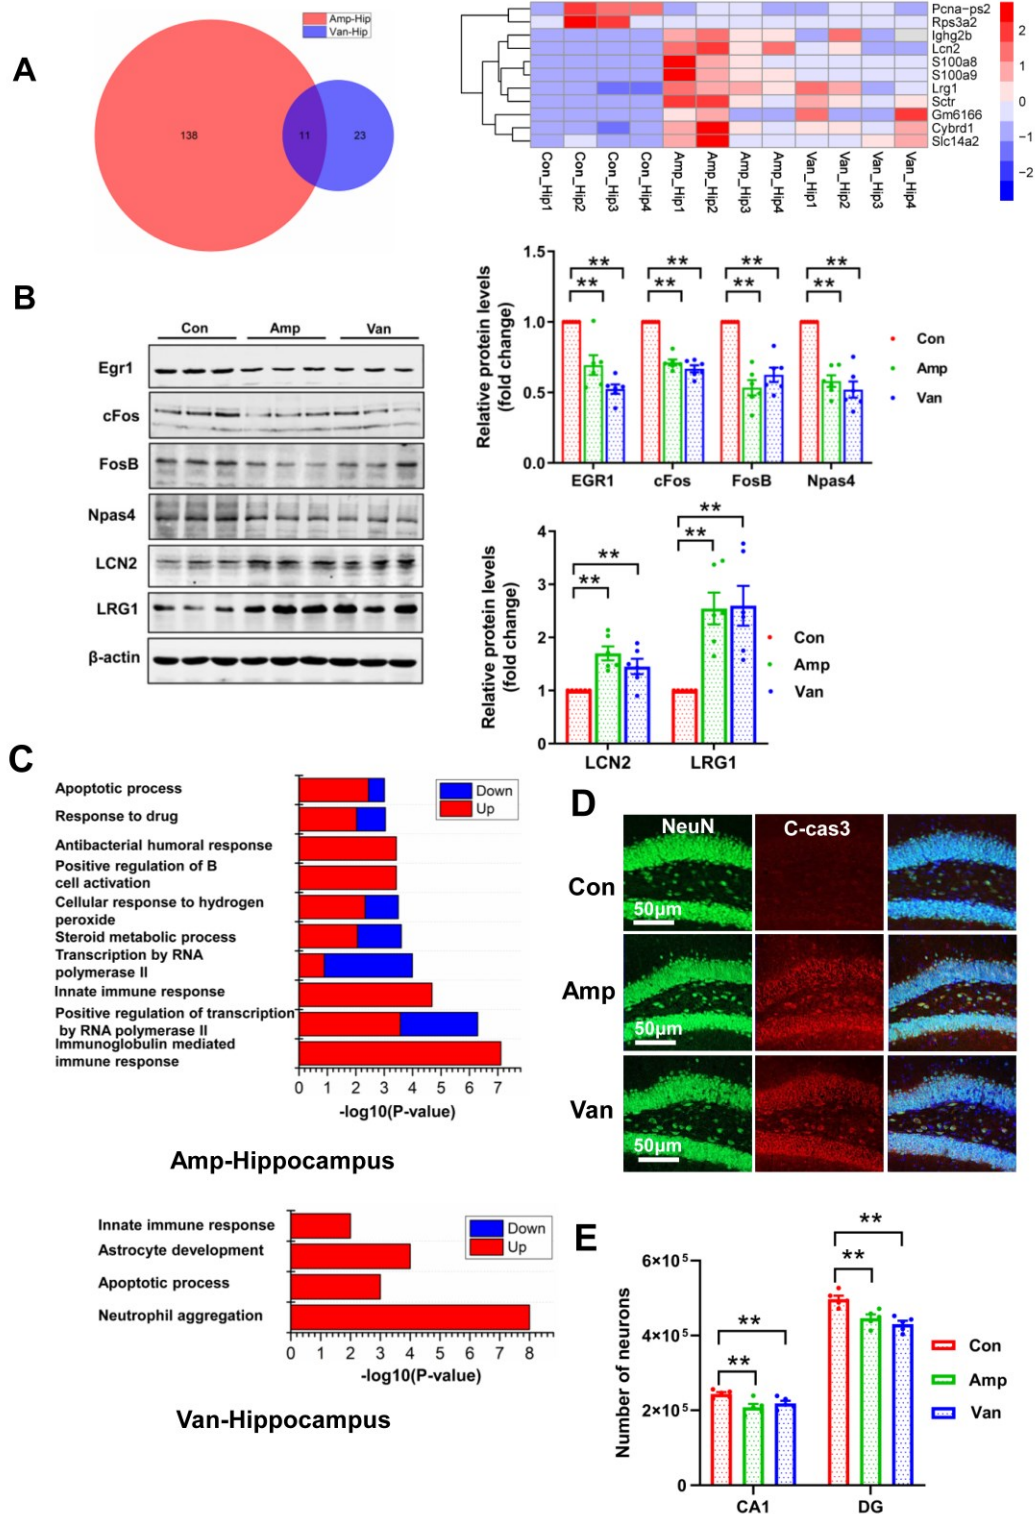

**Figure S3: Gut dysbiosis alters the gene expression in the hippocampus.**

(A) Heatmap of the common differential gene in hippocampus shared by antibiotic-treated mouse, FDR adjusted  $P$ -value of 0.1 and absolute foldchange of 2 was set as the threshold for significantly differential expression. (B) Quantitative

analysis of the expression of LCN2, LRG1 and immediate early genes,  $**P<0.01$ . (C) top biological pathways enriched for all the differential genes in antibiotic-treated mice. (D) The representative micrographs show that the cleaved caspase-3-positive cells significantly increased in the hippocampal DG following disruption of gut microbiota.  $N=5/\text{group}$ . The nuclei were stained with DAPI. (E) The representative micrographs show that early-life dysbiosis induced neuron loss in hippocampal DG and CA1.  $N=5/\text{group}$ . Data are presented as mean  $\pm$  SEM, unpaired two-tailed  $t$ -test,  $**P<0.01$ .

**Fig.S4**

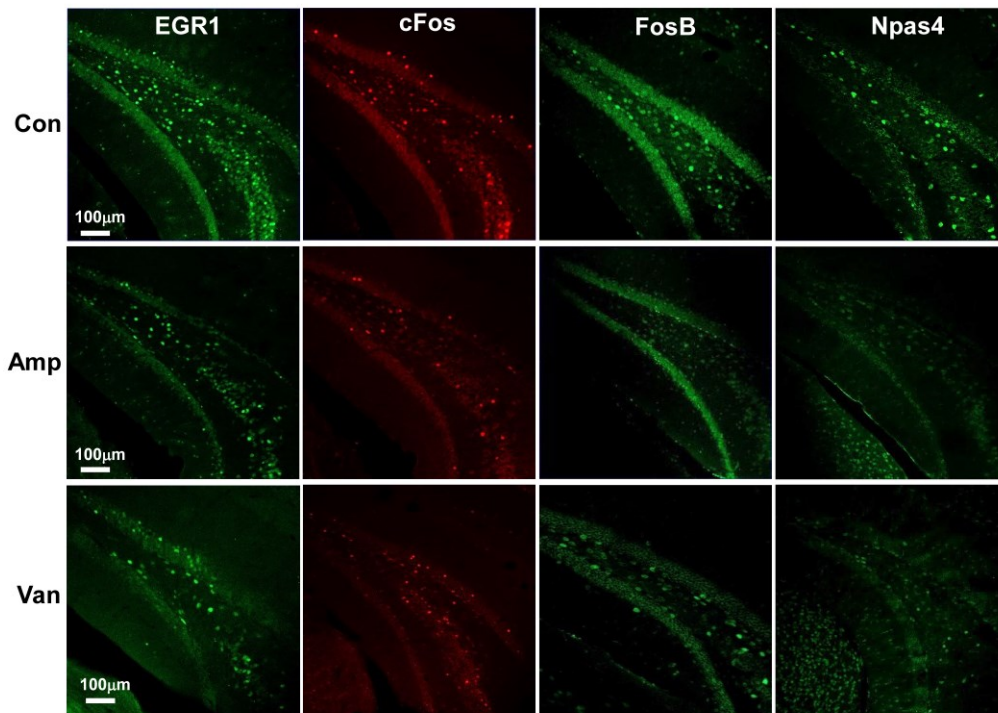

**Figure S4: Antibiotic treatment induced dysbiosis suppressed the increased hippocampal IEGs expression after social test.**

The representative micrographs show that antibiotic treatment resulted in an impairment the up-regulation of immediate early genes (*Egr1*, *cFos*, *FosB*, and *Npas4*) induced by social behavior test.  $N=5/\text{group}$ .



**Fig.S5**

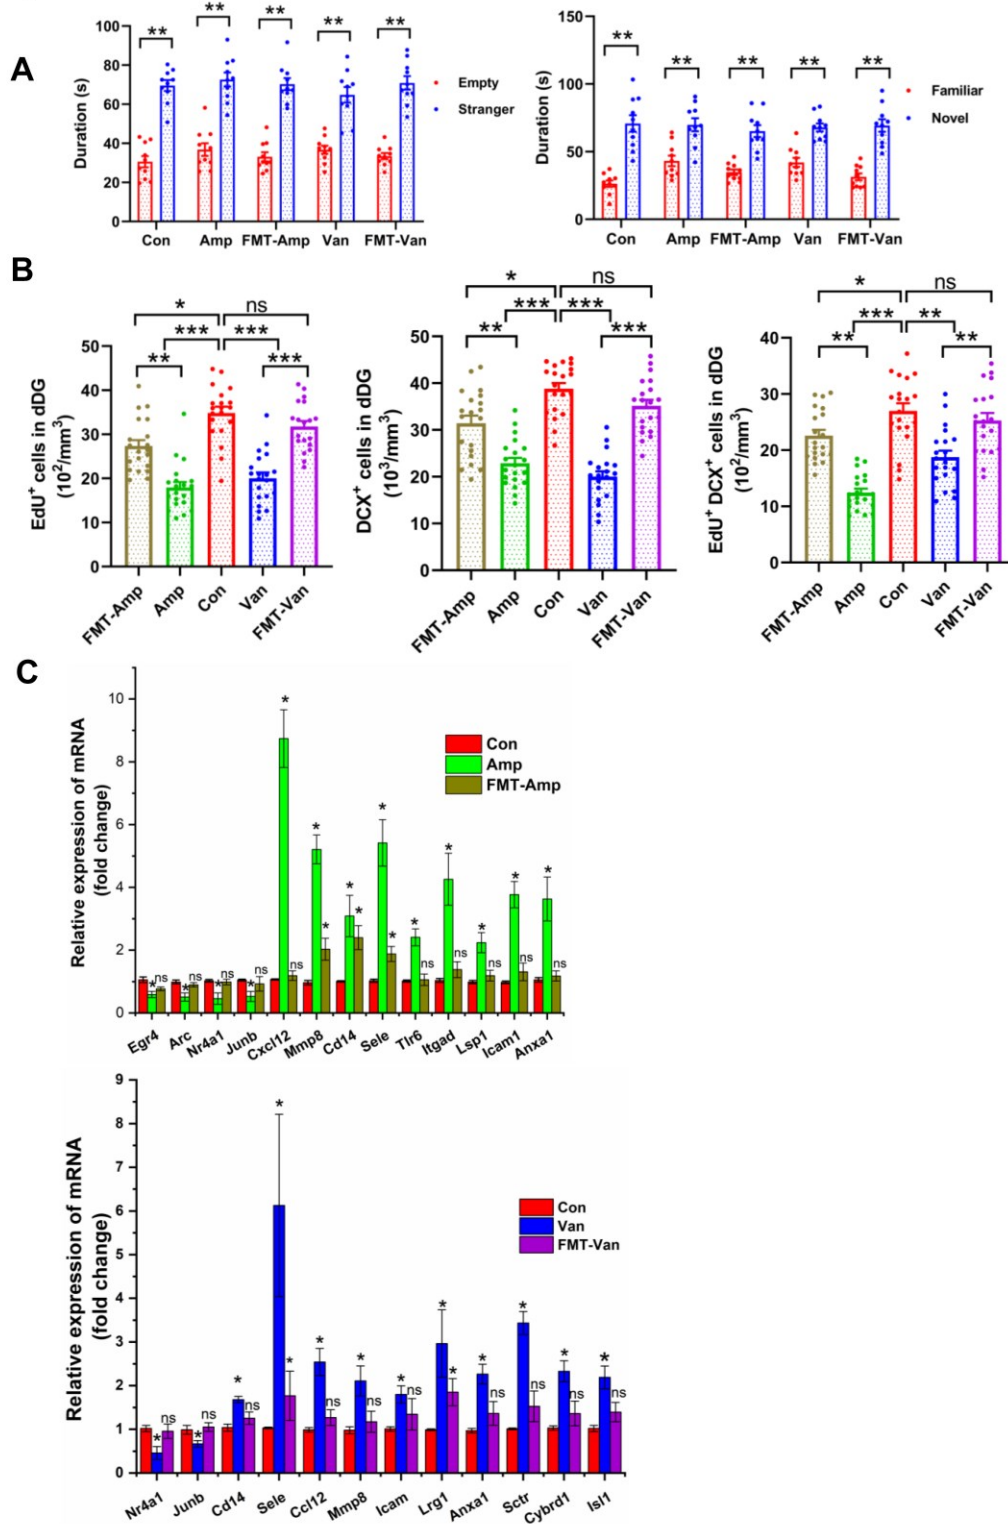

**Figure S5: Reconstitution with normal gut flora rescues the behavior deficit, adult neurogenesis, and the expression of differential genes in antibiotic-treated mice.**

(A) The interaction zone duration in the three-chamber sociability test. N=9-10/group.

Data are presented as mean  $\pm$  SEM, unpaired two-tailed *t*-test, \*\**P*<0.01. (B) Quantitative analysis of the cells positive for EdU, DCX and double-labeled DCX-EdU cells in the DG. N=5/group. Data are presented as mean  $\pm$  SEM, unpaired two-tailed *t*-test, \**P*<0.05, \*\**P*<0.01, \*\*\**P*<0.001, ns: no significance. (C) Real-time RT-PCR analysis shows that reconstituting healthy microbiota rescued the expression of differential genes in antibiotic-treated mice. The mRNA expressions were calculated via relative quantification and analyzed by  $2^{-\Delta\Delta CT}$  formula and normalized to the housekeeping gene GAPDH. Data are presented as mean  $\pm$  SEM, unpaired two-tailed *t*-test, \**P*<0.05, ns: no significance.



Fig.S6

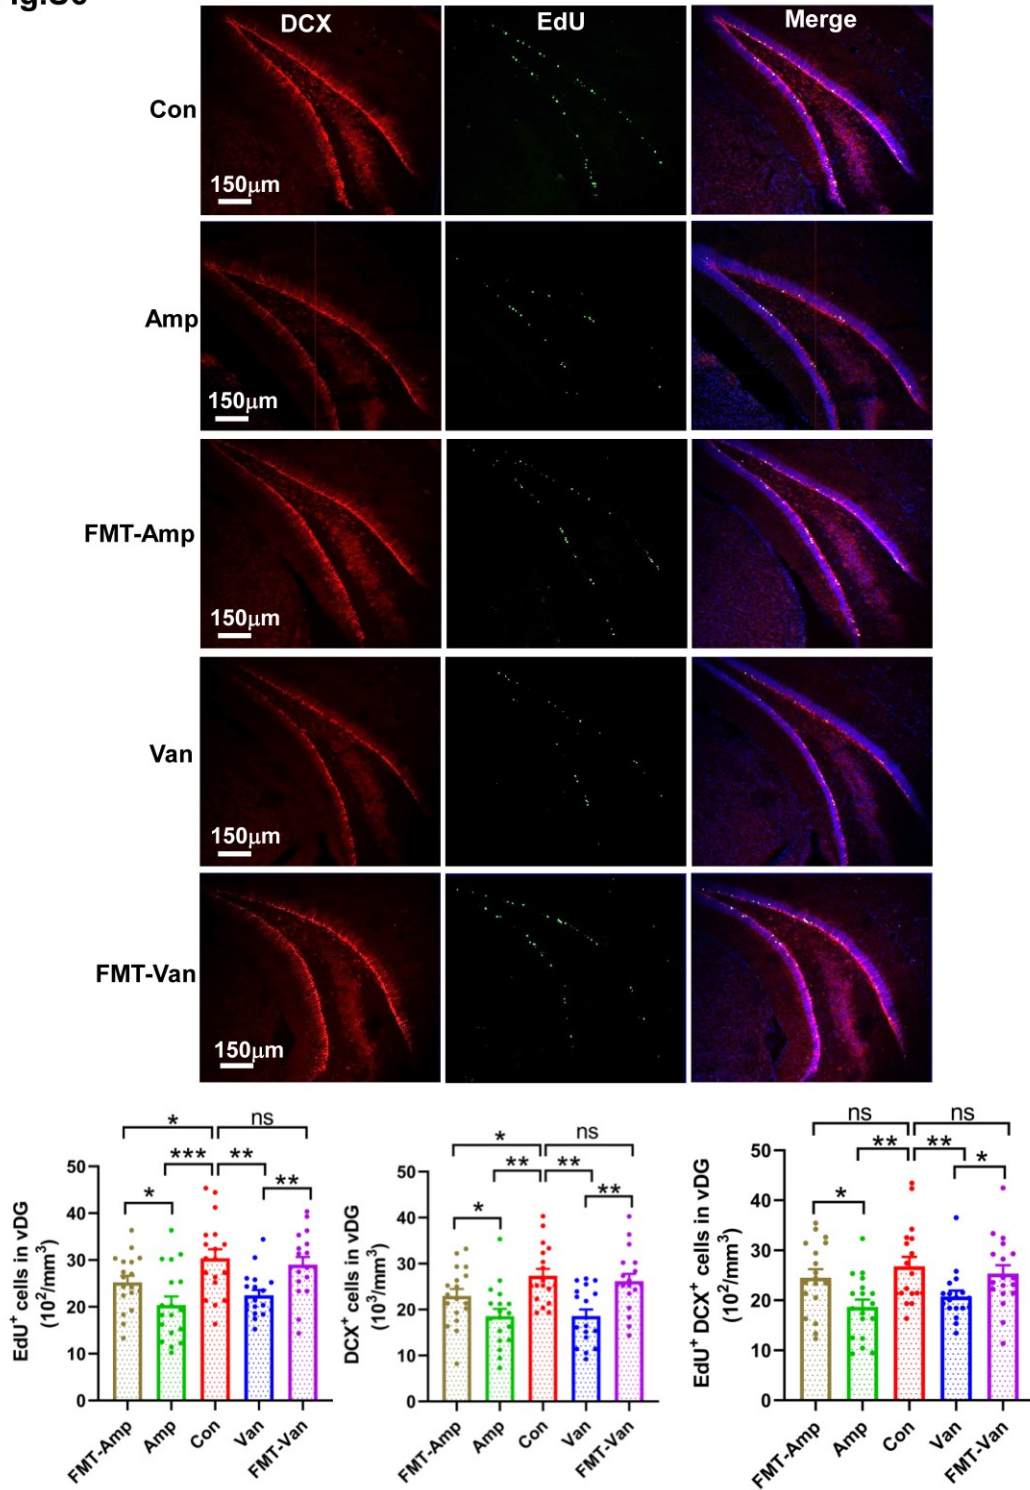

**Figure S6: FMT restore the adult neurogenesis in antibiotic-treated mice.**

The representative micrographs and quantitative analysis of the cells positive for EdU and DCX in the ventral hippocampus. EdU was used to label the proliferation of hippocampal progenitor cells, DCX was used to reflect neuronal differentiation. N=3/group. Data are presented as mean  $\pm$  SEM, unpaired two-tailed *t*-test, \*\*P<0.01,

\*\*\*P<0.001.

**Fig.S7**

**A**

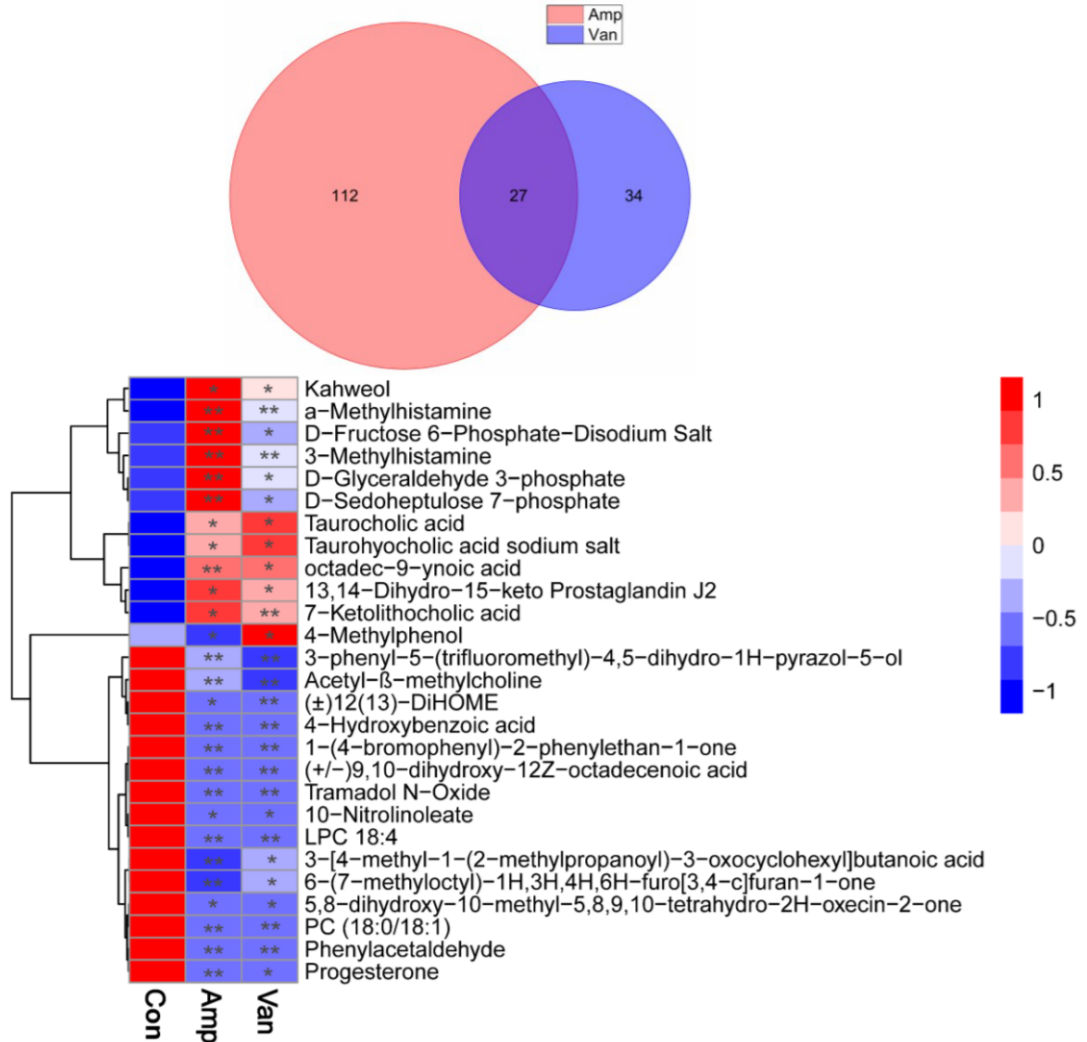

**B**

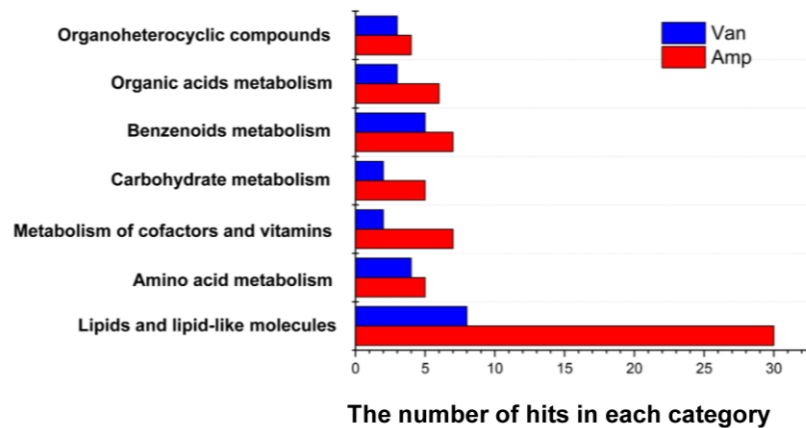

**Figure S7: The common differential metabolites in antibiotic-treated mice and**

**functional annotation of metabolites.**

(A) Venn diagram and heatmap show the common differential metabolites shared by Amp-treated and Van-treated mice. N=9-10/group. The metabolites with VIP > 1 and  $P$ -value < 0.05 and fold change > 2 were considered to be differential metabolites. Unpaired two-tailed  $t$ -test, \* $P$ <0.05, \*\* $P$ <0.01. (B) Functional annotation of differential metabolites in serum. Metabolites were annotated using the KEGG database, HMDB database, and LIPID Maps Database.

Fig.S8

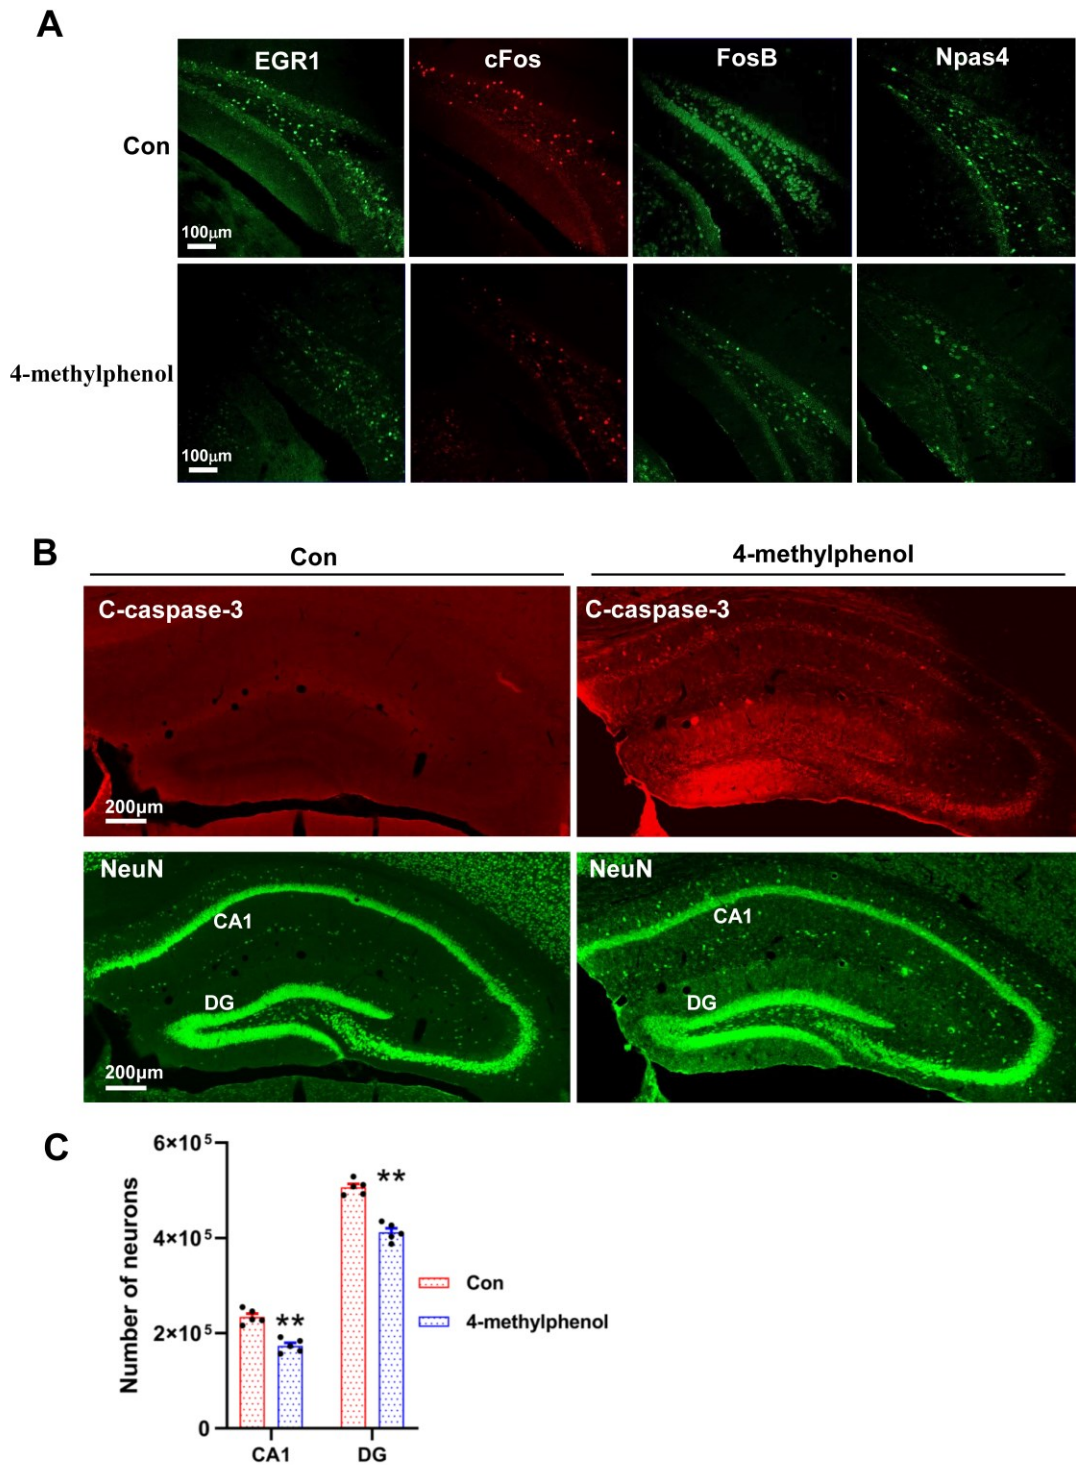

**Figure S8: The 4-methylphenol treatment suppressed the up-regulation of IEGs and induced neuron loss in hippocampus.**

(A) The representative micrographs show that 4-methylphenol treatment suppressed

the increased IEGs expression in the ventral hippocampus after social behavior test. N=3/group. (B) The representative micrographs show the hippocampal cleaved caspase-3-positive cells and NeuN-positive cells in the mice following 4-methylphenol treatment. N=5/group. (C) The 4-methylphenol treatment induced neuron loss in hippocampal DG and CA1. N=5/group. Data are presented as mean  $\pm$  SEM, unpaired two-tailed *t*-test, \*\**P*<0.01.

**Fig.S9**

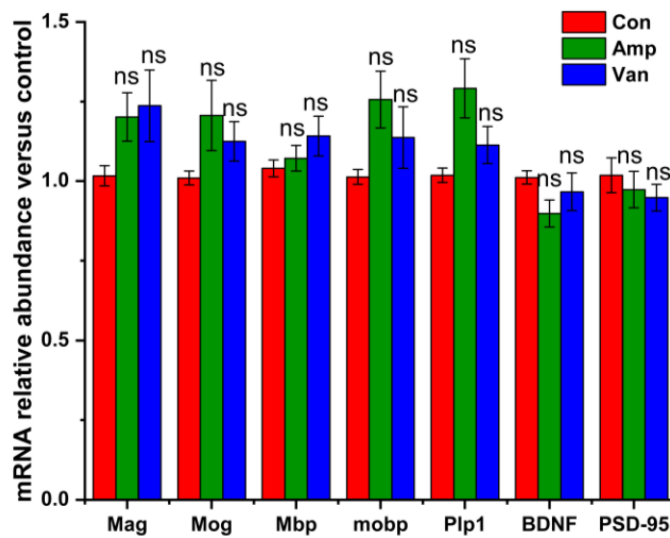

**Figure S9: Early-life gut dysbiosis did not lead to changes in the expression of myelin genes, BDNF and PSD95 in the prefrontal cortex.**

Real-time RT-PCR analysis suggests that the mRNA levels of myelin genes, BDNF and PSD95 were not changed following disruption of the gut microbiota. The mRNA expressions were calculated via relative quantification and analyzed by  $2^{-\Delta\Delta CT}$  formula and normalized to the housekeeping gene GAPDH. Data are presented as mean  $\pm$  SEM, unpaired two-tailed *t*-test, \**P*<0.05, ns: no significance.

**Table S1: The antibody used in this study**

| <b>Antibody</b>                                | <b>Supplier</b>            | <b>Dilution ratio</b> |
|------------------------------------------------|----------------------------|-----------------------|
| Doublecortin Rabbit Polyclonal Antibody        | Invitrogen-481200          | IF 1:200              |
| cFos Rat Monoclonal antibody                   | Synaptic<br>Systems-226017 | IF 1:400              |
| cFos Mouse Monoclonal antibody                 | Santa Cruz-SC-166940       | WB 1:500              |
| EGR1 Rabbit Polyclonal Antibody                | Proteintech-22008-1-AP     | IF 1:200; WB<br>1:800 |
| FosB Rabbit Polyclonal Antibody                | Affinity-AF5010            | IF 1:200; WB<br>1:500 |
| NPAS4 Rabbit Polyclonal Antibody               | Bioss-bs-19325R            | IF 1:150; WB<br>1:800 |
| NeuN Mouse Monoclonal Antibody                 | Millipore-MAB377           | IF 1:200              |
| LRG1 Rabbit Polyclonal Antibody                | Proteintech-13224-1-AP     | IF 1:150; WB<br>1:800 |
| LCN2 Rabbit Polyclonal Antibody                | Proteintech-26991-1-AP     | IF 1:100; WB<br>1:500 |
| Cleaved caspase3 Rabbit Polyclonal<br>Antibody | CST-9661s                  | IF 1:200; WB<br>1:800 |
| Caspase3 Rabbit Monoclonal Antibody            | Proteintech-19677-1-AP     | WB 1:800              |
| CD3E Rabbit Polyclonal Antibody                | Abclonal-A1753             | IF 1:200              |
| CD11b Rabbit Polyclonal Antibody               | Proteintech-21851-1-AP     | IF 1:200              |
| CD45 Rabbit Polyclonal antibody                | Proteintech-20103-1-AP     | IF 1:200              |
| S100A8 Polyclonal antibody                     | Proteintech-15792-1-AP     | IF 1:200, WB<br>1:800 |
| S100A9 Polyclonal antibody                     | Proteintech-26992-1-AP     | IF 1:200, WB<br>1:800 |
| GRIN1 (NMDAR1) Polyclonal antibody             | Proteintech-27676-1-AP     | WB 1:800              |
| $\beta$ -actin Mouse Monoclonal Antibody       | Proteintech-66009-1-lg     | WB 1:20000            |

**Table S2: The primer used by real-time RT-PCR in this study**

| <b>Gene</b> | <b>Primer sequence</b>    |
|-------------|---------------------------|
| Actb-F      | CCACTGTCGAGTCGCGTCC       |
| Actb-R      | ATTCCCACCATCACACCCTGG     |
| Anxa1-F     | CAAAGGTGGTCTCTGGGTCAG     |
| Anxa1-R     | ACTTCATCCAAGGGCTTTCCA     |
| Arc-F       | AAGCAGAGATGCTGAGGGAAC     |
| Arc-R       | TCACTGGTATGAATCACTGGG     |
| Ccl12-F     | GACACTGGTTCCTGACTCCT      |
| Ccl12-R     | ATCCAGTATGGTCTGAAGATCAC   |
| Cd14-F      | TTTCAGAATCTACCGACCATGGAGC |
| Cd14-R      | GTACAATTCCACATCTGCCGC     |
| Cybrd1-F    | CTCTCTCCGGGCAATCGTC       |
| Cybrd1-R    | GAGGGGTGTTTCAGGACAAA      |
| Egr1-F      | TCGGCTCCTTTCCTCACTCA      |
| Egr1-R      | GATGTCAGAAAAGGACTCTGTGG   |
| Egr4-F      | TTCTCTCCAAGCCCACCGAA      |
| Egr4-R      | AGCTCAAGAAGTCGCCTCCA      |
| cFos-F      | AGAGCGGGAATGGTGAAGAC      |
| cFos-R      | AGTTGATCTGTCTCCGCTTGG     |
| Icam1-F     | GTGGGTCTGAAGGTGGTTCTT     |
| Icam1-R     | CCAGCCGAGGACCATAACAG      |
| Itgad-F     | CATTTCTGAGAGCCCAGGTGT     |
| Itgad-R     | GACGTGAGATGTGGAGGAGTC     |
| Junb-F      | CTTGATCGTCCCCAACAGCA      |
| Junb-R      | TGACAAAACCGTCCGCAAAG      |
| Lcn2-F      | TTCTCTGTCCCCACCGACCA      |
| Lcn2-R      | GGAAAGATGGAGTGGCAGACA     |
| Lrg1-F      | TGGGGACTATATAAAGCCACCTTC  |
| Lrg1-R      | CTTGAGATCCTGGAGGCTTCCTT   |
| Lsp1-F      | ACAGCAGACACTCATCAGCC      |
| Lsp1-R      | CAGATGCTCTTCCGCCTCC       |
| Mmp8-F      | CTTGCCCATGCCTTTCACCC      |
| Mmp8-R      | GGGGTTGTCTGAAGGTCCATA     |
| Mmp9-F      | CTCTGCTGCCCCTTACCAG       |
| Mmp9-R      | AGCGGTACAAGTATGCCTCTGC    |
| Npas4-F     | CTCTGGATGCTGATCGCCTT      |
| Npas4-R     | CAGGTGGGTGAGCATGGAAT      |
| Nr4a1-F     | GCGAAAGTTGGGGGAGTGT       |
| Nr4a1-R     | GCTTGAATACAGGGCATCTCCAG   |
| Sctr-F      | GTCTGGTCGGATTGGGTAGG      |
| Sctr-R      | GGCAGAGCTCCAACAGGGT       |
| Sele-F      | AAGCAAAGAAATTTGTTCCCTGCTA |
| Sele-R      | ACGATGCATTTGTGTTCCCTGATT  |



---

|             |                         |
|-------------|-------------------------|
| Tlr6-F      | AGAAGGAAGTCTTGAGCTTGGA  |
| Tlr6-R      | TATTAAGGCCAGGGCGCAA     |
| Nr4a1-F     | GCGAAAGTTGGGGGAGTGT     |
| Nr4a1-R     | GCTTGAATACAGGGCATCTCCAG |
| Cdk2-F      | TCCGGCTCGACACTGAGA      |
| Cdk2-R      | GGAAGAGGAATGCCCCGTGAG   |
| Cdk4-F      | TTAGCCGAGCGTAAGGCTG     |
| Cdk4-R      | CCAGGCCGCTTAGAACTGA     |
| Cyclin D1-F | CAAAATGCCAGAGGGCGGATG   |
| Cyclin D1-R | CCAGGGCCTTGACCGGG       |
| Opa1-F      | TTCTGAGGCCCTTCTCTTGT    |
| Opa1-R      | TTCTTTGTCTGACACCTTCCTGT |
| Mfn1-F      | CAGGGACGGAGTGAGTGTCC    |
| Mfn1-R      | TCTGGATTCTGTATGTTGCTTCA |
| Cas3-F      | GCTTGGAACGGTACGCTAA     |
| Cas3-R      | TCCGTACCAGAGCGAGATGA    |
| Bcl2-F      | CGTCGTGACTTCGCAGAGAT    |
| Bcl2-R      | TAGTTCCACAAAGGCATCCCAG  |
| S100a9-F    | GGAAGGAAGGACACCCTGAC    |
| S100a9-R    | GGCTTCATTTCTTCTCTTTCTTC |
| Gria2-F     | ACCAATGCTTTCTGCTCCCA    |
| Gria2-R     | AGCAGAATCCAGCACAGCTT    |
| Gria3-F     | CCATGCTCTTGTCAGCTTCG    |
| Gria3-R     | AGTCCACCTATGCTGATGGT    |
| Gria4-F     | TACGACAAAGGAGAATGTGGCA  |
| Gria4-R     | GGCTTCGAAAAAGTCAGCTTCAT |
| NMDA1-F     | TCCTATGACAACAAGCGCGG    |
| NMDA1-R     | TGAAGTCCGATGATGCCGTC    |
| BDNF-F      | AGCGTCTTTTCCGAGGTTCG    |
| BDNF-R      | GGTGGAACTTCTTTGCGGCTT   |
| PSD95-F     | AGCCCCAGGATATGTGAACG    |
| PSD95-R     | GATGCTGTGCTTGACCCTGA    |
| Mag-F       | GGAGCCCAAGGGACTGTAAG    |
| Mag-R       | AGTGGCCTTTCAACCAAGTCT   |
| Mog-F       | TTACATGGAGGTTGGGCTTG    |
| Mog-R       | TATCACTCTGAATTGTCCTGCAT |
| Mbp-F       | TTCACGACCCCGGAACATAG    |
| Mbp-R       | GGGTGTTCAAGAGTGGTGCT    |
| Mobp-F      | CCAGAAGACTAGCCGCCG      |
| Mobp-R      | CATCAGAGGGGACTTTGGCT    |
| Plp1-F      | CTGGCTGAGGGCTTCTACAC    |
| Plp1-R      | GTGATGCCACAAACGTTGC     |

---
